# Supplementary material
Source: publisher figshare collection journal article supplement (https://sage.figshare.com/ndownloader/files/17890112)
Supplement: Supplementary file 1 [file 17890112]

## **Appendix 2**

*Curator's label from the museum:*

Alessandro Allori (1535–1607)

Portrait of a Young Man

Oil on panel

Signed and dated 1561 (on the table support)

Purchased with assistance from the (...), 1982

The young man pauses while polishing a medal. Beyond is an imaginary view with a figure in classical dress. A small replica of the antique statue of Apollo Citharoedus stands on an elaborate table. The original statue was then in the Della Valle collection in Rome.

The youth may be Paolo Capranica, a relative of the Della Valle. Or, he may come from the Conti Palma di Cesnola family, because their motto (Opraesa Resurgam) is on a scroll in the table inlay.

Allori was a pupil of Bronzino and shared his ideal of refinement in portraiture.
